# Supplementary material
Source: Springer Nature journal article supplement (https://www.springermedizin.de/resource/supplementary/13054_2009_8591_MOESM2_ESM.pdf/9732324)
Supplement: MOESM2 [file 9732324]

1843 abstracts from multiple electronic searches

115 Abstracts of interest identified and further reviewed

Review of published text of 24 “randomised” trials

17 studies excluded: 4 Abstracts from scientific meetings & 13 published papers

7 Abstracts identified from scientific- meeting proceedings

31 “randomised” trials for potential consideration

14 studies included in meta-analysis: 2 Abstracts from scientific meetings & 12 published papers
